# Supplementary material
Source: publisher figshare collection journal article supplement (https://gsajournals.figshare.com/ndownloader/files/22441142)
Supplement: Supplementary file 1 [file 22441142]

## Sheet: Plan1
PFAM: PF00704 : Glyco_hydro_18 : Glycoside hydrolase family
Gene	log2FoldChange	padj	Protein product	Protein name	Cross-reference (Pfam)
MAN_06105	-8.27174	3.87389e-14	KID65094.1	chitinase, partial	PF00704;
MAN_10487	-6.73826	4.02648e-13	KID59681.1	endo-N-acetyl-beta-D-glucosaminidase precursor, partial	PF00704;
MAN_02125	-4.77125	1.96854e-233	KID69611.1	chitinase 18-11, partial	PF00704;
MAN_07138	-2.76113	9.15225e-16	KID63967.1	class III chitinase ChiA2, partial	PF00704;
MAN_09429	-2.16916	3.9007e-05	KID61145.1	chitinase 18-15, partial	PF00704;
MAN_01345	-1.5308	2.66109e-07	KID71746.1	chitinase, partial	PF00704;
MAN_05741	-1.42306	9.69289e-12	KID66082.1	chitinase, partial	PF00734;PF00704;
MAN_09099	-1.33517	3.25611e-27	KID61334.1	alkaline phosphatase, partial	PF00704;
MAN_07104	-1.20102	7.54426e-34	KID63933.1	chitinase 18-4, partial	PF00704;
MAN_05824	-1.0372	4.88388e-08	KID64813.1	chitinase 18-3, partial	PF00704;
MAN_02751	-0.858685	0.100594	KID70237.1	Glycoside hydrolase, subgroup, catalytic core, partial	PF00187;PF00704;PF01476;
MAN_05179	0.0505975	0.861431	KID65520.1	chitinase CHIT30, partial	PF00704;
MAN_05584	0.645428	0.000125405	KID65925.1	chitinase, partial	PF00704;
MAN_09585	0.782507	2.22624e-24	KID60857.1	chitinase 18-7, partial	PF00704;
MAN_01370	0.89693	1.35391e-17	KID71771.1	chitinase, partial	PF00704;
MAN_10565	1.27372	0.00609564	KID59624.1	class III chitinase ChiA2, partial	PF00704;
MAN_00174	1.44057	9.88665e-14	KID70575.1	chitinase, partial	PF00704;
MAN_00045	2.0207	1.70119e-16	KID70446.1	Cellulose-binding domain, fungal, partial	PF00734;PF00704;
MAN_10732	3.21352	2.56362e-07	KID59427.1	Glycoside hydrolase, chitinase active site protein, partial	PF00704;
MAN_10405	5.15588	0	KID59764.1	chitinase 18-18, partial	PF00704;
MAN_10050	6.05784	NA	KID60233.1	chitinase, partial	PF00187;PF00704;
MAN_02753	NA	NA	KID70239.1	chitinase, partial	PF00704;
MAN_07219	NA	NA	KID64048.1	glycoside hydrolase family 18 protein, partial	PF00704;PF01476;
MAN_10554	NA	NA	KID59613.1	chitinase 18-11, partial	PF00704;
MAN_10724	NA	NA	KID59419.1	Glycoside hydrolase, subgroup, catalytic core, partial	PF00704;PF01476;
PFAM: PF03659 : Glyco_hydro_19 : Glycoside hydrolase family
Gene	log2FoldChange	padj	Protein product	Protein name	Cross-reference (Pfam)
MAN_07765	-0.808634	8.76405e-07	KID62549.1	alpha-1,3-glucanase, partial	PF03659;
PFAM: PF07335 : Glyco_hydro_75 : Glycoside hydrolase family
Gene	log2FoldChange	padj	Protein product	Protein name	Cross-reference (Pfam)
MAN_01994	-5.49198	0.00135226	KID69480.1	chitosanase, partial	PF07335;
MAN_00041	-1.73066	1.9193e-53	KID70442.1	Fungal chitosanase, partial	PF07335;
MAN_01279	3.20789	1.63407e-180	KID71680.1	chitosanase precursor, partial	PF07335;
PFAM: PF16499 : Glycoside hydrolase family 27 / PF00652: Ricin_B_lectin
Gene	log2FoldChange	padj	Protein product	Protein name	Cross-reference (Pfam)
MAN_06828	-2.82337	4.20958e-29	KID64654.1	alpha-N-acetylgalactosaminidase, partial	PF16499;PF00652;
MAN_07264	1.06997	0.000453136	KID63063.1	alpha-galactosidase, partial	PF16499;
PFAM: PF00933: Glycoside hydrolase family Glyco_hydro_3
Gene	log2FoldChange	padj	Protein product	Protein name	Cross-reference (Pfam)
MAN_03066	-2.93455	6.64044e-128	KID68210.1	Glycoside hydrolase, family 3, partial	PF14310;PF00933;PF01915;
MAN_07632	1.99082	6.50599e-87	KID63431.1	Glycoside hydrolase, family 3, partial	PF00933;
MAN_07819	-1.34261	9.51037e-74	KID62603.1	Glycoside hydrolase, family 3, partial	PF14310;PF00933;PF01915;PF07691;
MAN_03578	-0.968472	1.32953e-11	KID68722.1	Glycoside hydrolase, family 3, partial	PF14310;PF00933;PF01915;
MAN_04359	-0.338644	1.91116e-07	KID67601.1	beta-N-acetylglucosaminidase, partial	PF00933;
MAN_09007	-0.534887	8.32268e-05	KID61242.1	Glycoside hydrolase, family 3, partial	PF14310;PF00933;PF01915;
MAN_07023	0.186127	0.00654976	KID63852.1	Glycoside hydrolase, family 3, partial	PF14310;PF00933;PF01915;
MAN_08274	0.804709	0.0153839	KID62270.1	Glycoside hydrolase, family 3, partial	PF00933;
PFAM: PF01644: Chitin synthase: Chitin_synth_1 (PF01644); Chitin_synth_1N (PF08407)
Gene	log2FoldChange	padj	Protein product	Protein name	Cross-reference (Pfam)
MAN_01349	-0.754536	3.83459e-20	KID71750.1	class 2 chitin synthase, partial	PF01644;PF08407;
MAN_00898	0.11379	0.284204	KID71299.1	chitin synthase class I, partial	PF01644;PF08407;
MAN_01089	-0.0499648	0.516227	KID71490.1	chitin synthase 1, partial	PF01644;PF08407;
PFAM: PF00063 Myosin_head
Gene	log2FoldChange	padj	Protein product	Protein name	Cross-reference (Pfam)
MAN_10807	-1.13915	1.43516e-46	KID59315.1	myosin type II heavy chain, partial	PF00063;PF02736;PF01576;
MAN_08582	-0.867288	4.03132e-27	KID61903.1	class VII chitin synthase, partial	PF00173;PF08766;PF00063;
MAN_08581	-0.717873	1.35275e-19	KID61902.1	class V chitin synthase, partial	PF00173;PF08766;PF00063;
MAN_07078	-0.382726	2.67948e-07	KID63907.1	Myosin head, motor domain protein, partial	PF01843;PF00612;PF00063;
MAN_05871	0.282781	0.00774386	KID64860.1	myosin-5, partial	PF00063;PF06017;PF00018;
PFAM: PF00722 : Glyco_hydro_16
Gene	log2FoldChange	padj	Protein product	Protein name	Cross-reference (Pfam)
MAN_01263	5.04347	0	KID71664.1	beta-1,3-endoglucanase, partial	PF00722;
MAN_08250	0.562899	2.51686e-10	KID62246.1	cell wall glucanase (Utr2), partial	PF00722;
MAN_04205	-0.34912	0.000501131	KID67447.1	cell wall glucanosyltransferase Mwg1, partial	PF00722;
MAN_09520	-0.00582822	0.986926	KID60792.1	cell wall glucanosyltransferase Mwg1, partial	PF00722;
MAN_03626	-4.93526	0	KID68770.1	cell wall glucanosyltransferase Mwg2, partial	PF00722;
MAN_03416	-6.16602	4.68331e-65	KID68560.1	Concanavalin A-like lectin/glucanase, partial	PF00722;
MAN_02846	-1.13306	3.74102e-36	KID67990.1	Concanavalin A-like lectin/glucanase, partial	PF00722;
MAN_02282	-0.866607	0.00539968	KID69768.1	Concanavalin A-like lectin/glucanase, partial	PF00722;
MAN_00671	7.14483	0	KID71072.1	Concanavalin A-like lectin/glucanase, partial	PF00722;PF01822;
MAN_10545	NA	NA	KID59604.1	Concanavalin A-like lectin/glucanase, partial	PF00722;
MAN_03658	0.40328	0.105485	KID68802.1	endo-1,3(4)-beta-glucanase, partial	PF00722;
MAN_03452	-0.67006	1.04589e-13	KID68596.1	extracellular cell wall glucanase Crf1, partial	PF00722;
MAN_10435	-1.94554	2.20186e-46	KID59794.1	glucan 1,3-beta-glucosidase, partial	PF00722;
MAN_00636	-3.67059	9.37214e-96	KID71037.1	glucan endo-1,3-beta-glucosidase A1-like protein, partial	PF00722;
MAN_04534	0.60575	0.000471847	KID66253.1	glycoside hydrolase family 16, partial	PF00722;
MAN_05496	1.78253	1.44685e-63	KID65837.1	glycoside hydrolase family 16, partial	PF00722;
MAN_05722	-1.71672	8.68657e-87	KID66063.1	glycosyl hydrolase family 16, partial	PF00722;
MAN_10232	-0.609656	2.83245e-07	KID59982.1	gram-negative bacteria-binding protein 1 precursor, partial	PF00722;
